# Supplementary material
Source: PubMed Central journal article supplement (PMC7854513)
Supplement: NIHMS1663508-supplement-1663508_Sup_Fig_1-2.pdf [file NIHMS1663508-supplement-1663508_Sup_Fig_1-2.pdf]

**Supplemental Figure 1.**

**A** Layer V Pyramidal Neurons

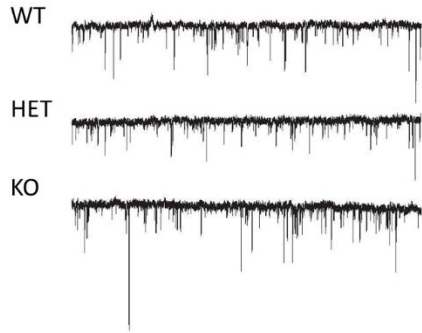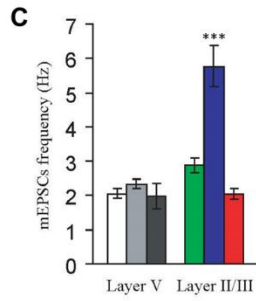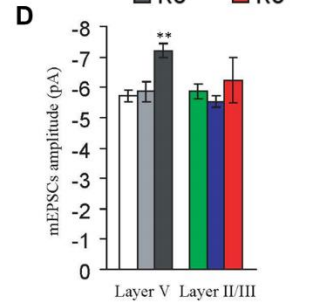

**B** Layer II/III Pyramidal Neurons

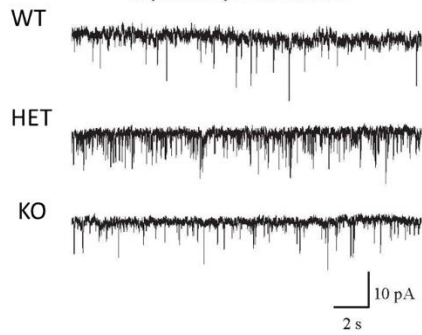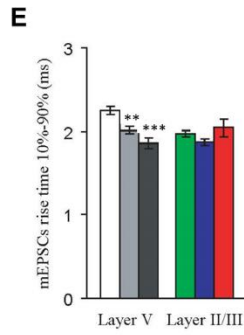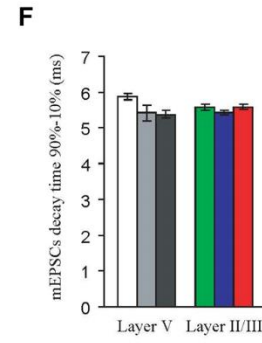

**G** Layer V Pyramidal Neurons

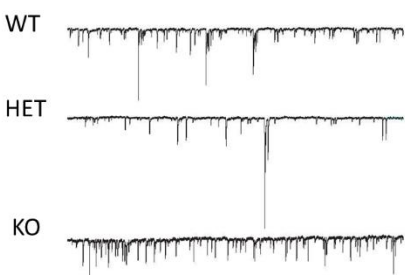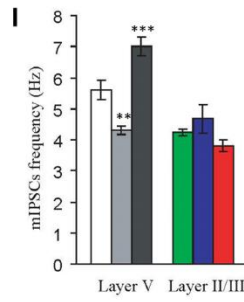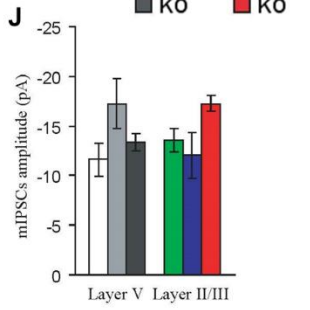

**H** Layer II/III Pyramidal Neurons

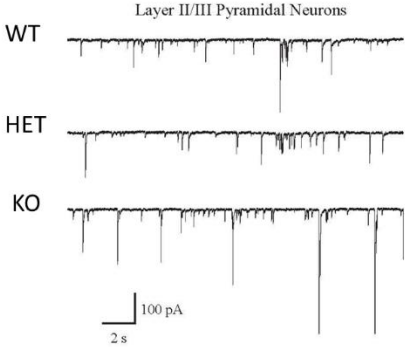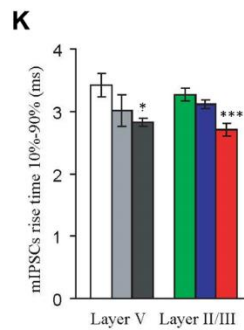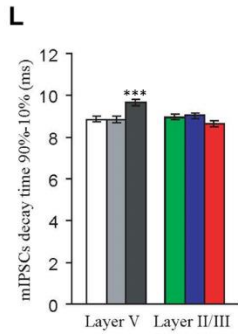

**Supplemental Figure 1. Abnormal excitatory and inhibitory inputs onto pyramidal neurons in the lamina V and lamina II/III of mPFC in *Akt2* HET and KO mice.**

(A-B) Representative traces and quantification of mEPSCs of *Akt2* HET, KO and their WT littermates mice. The excitatory synaptic transmission to pyramidal neurons in the lamina V and lamina II/III of mPFC was detected by whole-cell recordings, in the presence of 1.5  $\mu$ M TTX and 50  $\mu$ M bicuculline. (C) mEPSCs frequency (Hz) (univariate one-way ANOVA:  $F(2,43) = 19.540$ ;  $p \leq 0.001$ . Bonferroni post-hoc:  $***p \leq 0.001$  HET vs WT). (D) mEPSCs amplitude (pA) (univariate one-way ANOVA:  $F(2,45) = 5.890$ ;  $p = 0.005$ . Bonferroni post-hoc:  $**p = 0.006$  KO vs WT). (E) mEPSCs rise time (ms) (univariate one-way ANOVA:  $F(2,45) = 11.863$ ;  $p \leq 0.001$ . Bonferroni post-hoc:  $**p = 0.004$  HET vs WT,  $***p \leq 0.001$  KO vs WT). (F) mEPSCs decay time (ms). Lamina V: N = 3 WT (10 slices, 19 cells), 3 HET (10 slices, 20 cells), 3 KO (9 slices, 9 cells). Lamina II-III: N = 3 WT (9 slices, 17 cells), 3 HET (10 slices, 19 cells), 3 KO (9 slices, 10 cells). Data represent mean  $\pm$  SEM.

(G-H) Representative traces and quantification of mIPSCs of *Akt2* HET, KO and their WT littermates. The inhibitory synaptic transmission to pyramidal neurons in the lamina V and lamina II/III of mPFC was detected by whole-cell voltage clamp, in the presence of 1.5  $\mu$ M TTX, 50  $\mu$ M APV and 50  $\mu$ M CNQX. (I) mIPSCs frequency (Hz) (Lamina V univariate one-way ANOVA:  $F(2,41) = 21.637$   $p \leq 0.001$ ; Bonferroni post hoc:  $**p = 0.005$  HET vs WT,  $***p = 0.001$  KO vs WT). (J) mIPSCs amplitude (pA). (K) mIPSCs rise time (ms) (Lamina V univariate one-way ANOVA:  $F(2,41) = 4.147$   $p = 0.023$ ; Bonferroni post hoc:  $*p \leq 0.02$  KO vs WT; Lamina II-III univariate one-way ANOVA:  $F(2,35) = 10.229$   $p \leq 0.001$ ; Bonferroni post hoc:  $***p \leq 0.001$  KO vs WT,  $##p = 0.001$  KO vs HET). (L) mIPSCs decay time (ms) (Lamina V univariate one-way ANOVA:  $F(2,41) = 11.407$   $p \leq 0.001$ ; Bonferroni post-hoc:  $***p \leq 0.001$  KO vs WT). Lamina V:

N = 3 WT (10 slices, 15 cells), 3 HET (9 slices, 11 cells), 3 KO (9 slices, 18 cells). Lamina II-III:

N = 3 WT (9 slices, 14 cells), 3 HET (9 slices, 11 cells), 3 KO (9 slices, 11 cells). Data represent

mean  $\pm$  SEM. \*  $p \leq 0.05$ , \*\*  $p \leq 0.01$ , \*\*\*  $p \leq 0.001$ .

**Supplemental Figure 2**

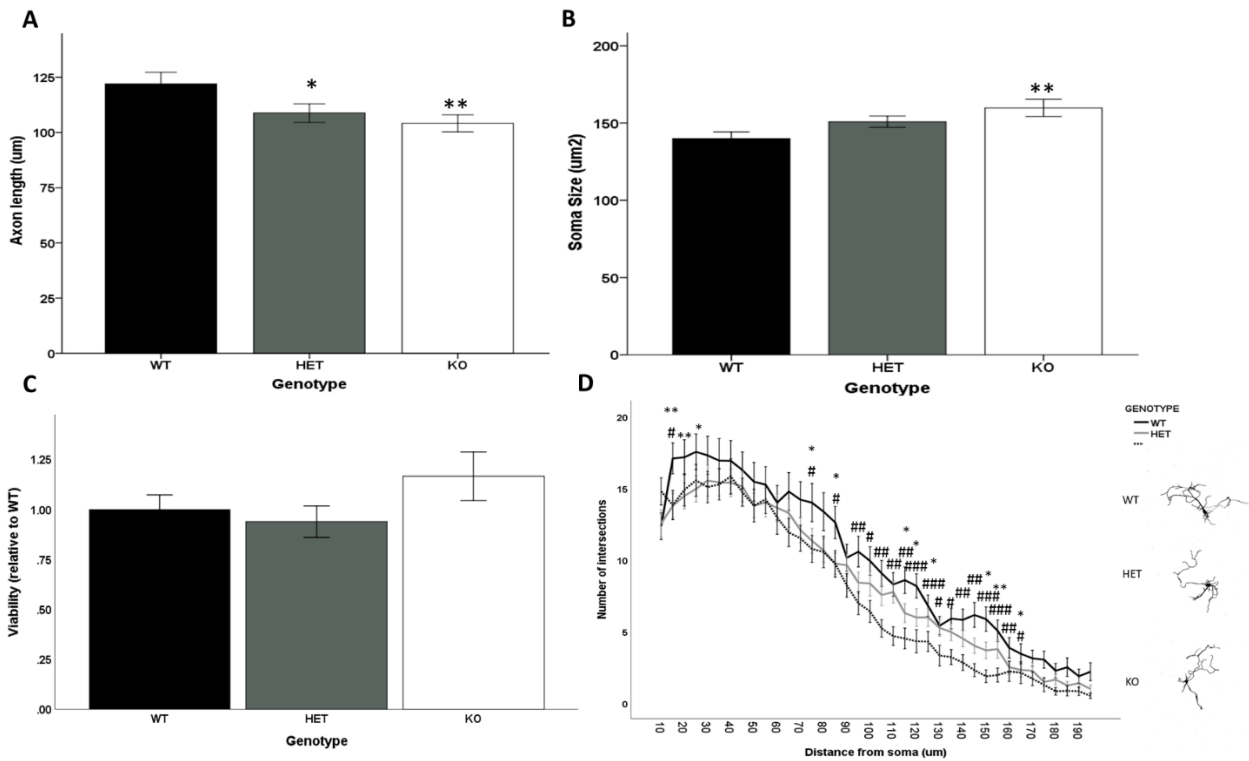

**Supplemental Figure 2. Altered neuronal morphology, and dendritic complexity without effects on viability in *Akt2* HET and KO *ex vivo* hippocampal cultures.**

(A) Axon length of hippocampal neurons at DIV3 derived from WT, HET and KO *Akt2* embryos at E18. Axon length is significantly decreased in HET and KO neurons compared to WT neurons ( $p < 0.05$  and  $< 0.01$ , respectively). (B) Soma size of hippocampal neurons at DIV3 derived from WT, HET and KO *Akt2* embryos at E18. Soma is significantly larger in KO neurons compared to WT neurons ( $p < 0.01$ ). WT=120 neurons, HET=150 neurons, KO= 120 neurons derived from  $\geq 3$  embryos/genotype. (C) Neuronal viability in hippocampal neurons derived from WT, HET and KO *Akt2* embryos at E18 is unaffected at DIV4. WT= 11 embryos, HET=15 embryos, KO=6 embryos. (D) Sholl analysis of dendritic complexity in DIV 10 hippocampal neurons derived from WT, HET and KO *Akt2* embryos at E18. Dendritic complexity is

significantly reduced in HET and KO neurons compared to WT neurons ( $p < 0.05$  and  $< 0.01$ , respectively). WT=112 neurons, HET=82 neurons, KO= 47 neurons derived from  $\geq 3$  embryos/genotype. Right, representative traces of DIV 10 neurons. Data represent mean  $\pm$  SEM.

\*  $p \leq 0.05$ , \*\*  $p \leq 0.01$ , \*\*\*  $p \leq 0.001$ .
